# Supplementary material
Source: PubMed Central journal article supplement (PMC2804203)
Supplement: supp_M109.036491_Hughes_et_al_Supplemental_Data.pdf [file supp_M109.036491_Hughes_et_al_Supplemental_Data.pdf]

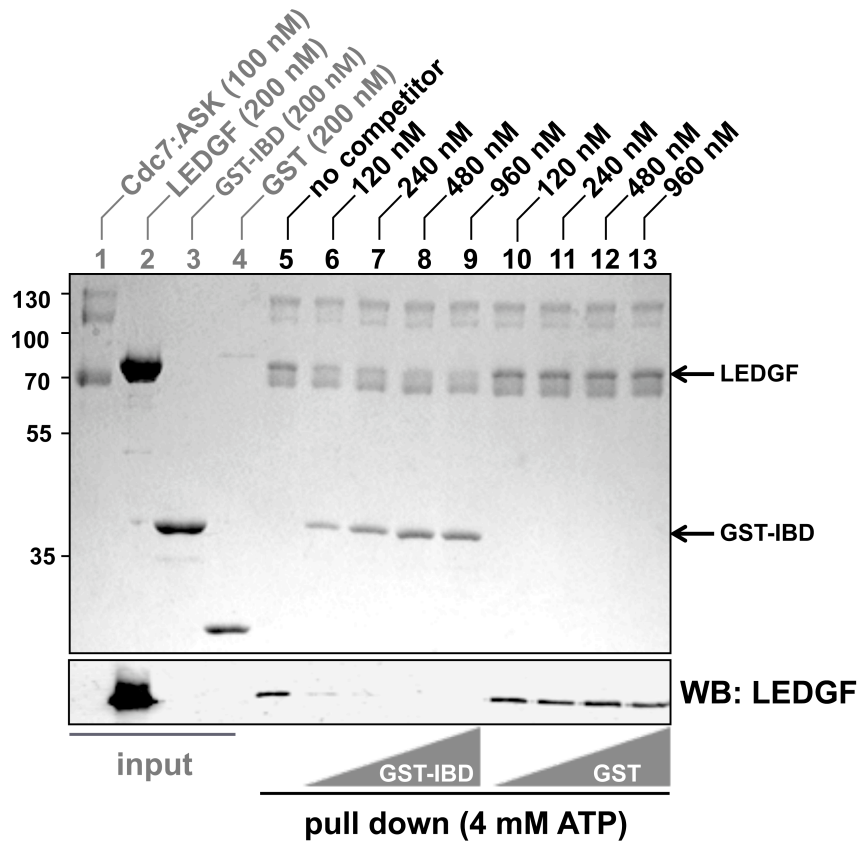

**Supplemental Fig. S1.** LEDGF IBD competes with full-length LEDGF for binding to Cdc7:ASK. Cdc7:ASK (100 nM) was incubated with 200 nM LEDGF, 4 mM ATP, and S protein agarose in the absence (*lane 5*) or presence of 120-960 nM GST-LEDGF(347-471) (GST-IBD, *lanes 6-9*) or GST (*lanes 10-13*). Proteins bound to the beads were separated by SDS PAGE and visualized by staining with Coomassie Blue (top) or western blotting with anti-LEDGF antibody (bottom). *Lanes 1-4* contained input proteins. Migration of protein molecular weight standards is indicated to the left of the Coomassie-stained gel; migration of LEDGF and GST-IBD are indicated to the right.

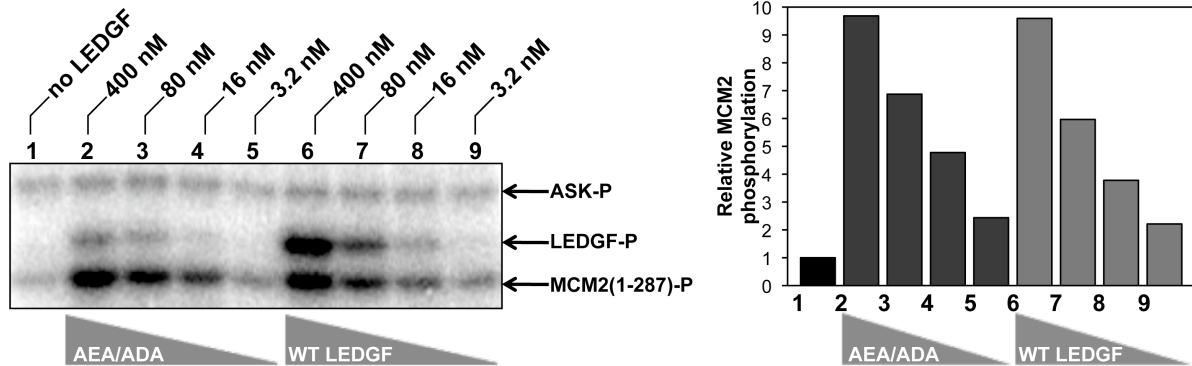

**Supplemental Fig. S2.** Stimulation of Cdc7:ASK kinase activity is independent of the phosphorylation state of LEDGF. Phosphorylation of GST-MCM2(1-287) *in vitro* by Cdc7:ASK in the absence (*lane 1*) or presence of 400-3.2 nM WT (*lanes 6-9*) or AEA/ADA LEDGF (*lanes 2-5*). Reaction products, resolved by SDS PAGE, were visualized by phosphorescence imaging (left). Migration positions of phosphorylated ASK (ASK-P), LEDGF (LEDGF-P) and GST-MCM2(1-287) (MCM2(1-287)-P) are indicated. Quantification of GST-MCM2(1-287) phosphorylation, relative to the condition without LEDGF (*lane 1*), is shown on the right.

**SUPPLEMENTAL TABLE S1.****DNA constructs used in this work**

| <b>Name</b>              | <b>Purpose</b>                                                              | <b>Host<sup>1</sup></b> | <b>Reference<sup>2</sup></b> |
|--------------------------|-----------------------------------------------------------------------------|-------------------------|------------------------------|
| pGM-Mel18-cTAP           | cTAP fusion vector                                                          | M                       | (1)                          |
| pGM-hLEDGF(326-530)-cTAP | Expression of LEDGF(326-530)-cTAP                                           | M                       | This work                    |
| pCPHA-NLS                | HA-fusion vector                                                            | M                       | (2)                          |
| pCPHA-38                 | Expression of HA-LEDGF(326-530)                                             | M                       | This work                    |
| pBHA75                   | Expression of human HA-LEDGF                                                | M                       | (2)                          |
| pHcRed1-p75              | Expression of human LEDGF with N-terminal HcRed1 tag                        | M                       | (3)                          |
| pHcRed1-p52              | Expression of human p52 with N-terminal HcRed1 tag                          | M                       | (3)                          |
| PCPHA-HRP2               | Expression of human HA-HRP2                                                 | M                       | (2)                          |
| pLB(N)CX-mp75-HA         | Expression of mouse LEDGF-HA                                                | M                       | This work                    |
| pLB(N)CX-mp52-HA         | Expression of mouse p52-HA                                                  | M                       | This work                    |
| pTRE2-75-hyg             | Tetracycline-responsive expression of non-tagged human LEDGF                | M                       | This work                    |
| pTRE2-HA75-hyg           | Tetracycline-responsive expression of HA-tagged human LEDGF                 | M                       | This work                    |
| pIRES2-LEDGF-eGFP        | Expression of non-tagged WT human LEDGF                                     | M                       | (4)                          |
| pIRES2-LEDGFAIBD-eGFP    | Expression of non-tagged human LEDGF lacking residues 347-430               | M                       | This work                    |
| pIRES2-LEDGF(EEE)-eGFP   | Expression of full-length human LEDGF K401E/K402E/R405E mutant              | M                       | (4)                          |
| pcDNA3.1-Flag-Cdc7       | Expression of Flag-Cdc7                                                     | M                       | This work                    |
| pEGFP-Cdc7               | Expression of EGFP-Cdc7                                                     | M                       | This work                    |
| pCPHA-Dbf4               | Expression of human HA-ASK                                                  | M                       | This work                    |
| pCPHA-Dbf4(1-624)        | Expression of human HA-ASK, lacking 50 C-terminal residues                  | M                       | This work                    |
| pQFlag-MCM2-8xHis        | Retroviral vector for expression of human Flag-MCM2-His <sub>8</sub>        | M                       | This work                    |
| pCG-GAG-POL              | Gammaretroviral packaging construct                                         | M                       | (5)                          |
| pCG-VSV-G                | Envelope expression for retroviral vector production                        | M                       | (5)                          |
| pRSF-CDC7-S-tag          | Expression of human Cdc7 with C-terminal S tag                              | E                       | This work                    |
| pCDF-His-Dbf4            | Expression of full-length human ASK with an N-terminal His <sub>6</sub> tag | E                       | This work                    |
| pCDF-His-Dbf4(1-350)     | Same for ASK(1-350)                                                         | E                       | This work                    |
| pCDF-His-Dbf4(174-350)   | Same for ASK(174-250)                                                       | E                       | This work                    |
| pCDF-His-Dbf4(174-674)   | Same for ASK(174-674)                                                       | E                       | This work                    |
| pCDF-His-Dbf4(1-624)     | Same for ASK(1-624)                                                         | E                       | This work                    |
| pCDF-His-Dbf4(1-541)     | Same for ASK(1-541)                                                         | E                       | This work                    |
| pFT1-LEDGF               | Expression of full-length human LEDGF with a cleavable His <sub>6</sub> tag | E                       | (6)                          |
| pCPH6P-LEDGF(146-530)    | Same for LEDGF(146-530)                                                     | E                       | This work                    |
| pCPH6P-LEDGF(226-530)    | Same for LEDGF(226-530)                                                     | E                       | This work                    |
| pCPH6P-LEDGF(249-530)    | Same for LEDGF(249-530)                                                     | E                       | This work                    |
| pCPH6P-LEDGF(291-530)    | Same for LEDGF(291-530)                                                     | E                       | This work                    |
| pCPH6P-LEDGF(347-530)    | Same for LEDGF(347-530)                                                     | E                       | This work                    |
| pFT1-LEDGFAIBD           | Same for LEDGF lacking residues 347-430                                     | E                       | This work                    |
| pFT1-LEDGF(SDA)          | Expression of full-length human LEDGF S275A mutant                          | E                       | This work                    |
| pFT1-LEDGF(ADA)          | Same for LEDGF S273A/275A                                                   | E                       | This work                    |
| pFT1-LEDGF(AEA)          | Same for LEDGF S206A/S208A                                                  | E                       | This work                    |
| pFT1-LEDGF(AEA/ADA)      | Same for LEDGF S206A/S208A/S273A/S275A                                      | E                       | This work                    |
| pFT1-LEDGF(S206A)        | Same for LEDGF S206A                                                        | E                       | This work                    |
| pFT1-LEDGF(S208A)        | Same for LEDGF S208A                                                        | E                       | This work                    |
| pCP-GST-81               | Expression of GST-LEDGF(347-471)                                            | E                       | (2)                          |
| pCP-GST-HRP2-IBD         | Expression of GST-HRP2(470-593)                                             | E                       | (2)                          |
| pCP-GST-MCM2(1-287)      | Expression of GST-MCM2(1-287)                                               | E                       | This work                    |

<sup>1</sup>Host for expression: M, mammalian; E., *Escherichia coli*.<sup>2</sup>See supplemental References

**SUPPLEMENTAL TABLE S2.****Cdc7-specific peptides identified in the material co-purified with LEDGF(326-530)-cTAP**

Cdc7-specific peptides were detected and confirmed by LC-MS/MS; their locations within the sequence of human Cdc7 and experimental masses are shown.

| Location | Sequence           |
|----------|--------------------|
| 91-100   | HLIPTSHPIR         |
| 177-187  | DVKPSNFLYNR        |
| 228-244  | SHITGNKIPLSGPVPK   |
| 258-268  | RPYTNAQIIK         |
| 313-319  | TVDVLSR            |
| 417-431  | ASDDLTAQAQIMTIR    |
| 475-492  | LTSDIQGHASHQPAISEK |
| 549-557  | LLDLNPASR          |

**SUPPLEMENTAL TABLE S3.****LEDGF phosphopeptides and their locations within the amino acid sequence**

Tryptic peptides were derived from recombinant LEDGF phosphorylated *in vitro* with Cdc7:ASK, or HA-LEDGF isolated from asynchronously growing or S-phase H3 cells. Phosphorylation sites, compatible with results of tandem mass spectrometry analyses, are underlined, and those assigned with confidence are printed in bold type.

| Location                          | <i>In vitro</i> phosphorylation with Cdc7:ASK                                       | Asynchronous cells                                                                                                                                            | S-phase cells                                                                                                                                                  |
|-----------------------------------|-------------------------------------------------------------------------------------|---------------------------------------------------------------------------------------------------------------------------------------------------------------|----------------------------------------------------------------------------------------------------------------------------------------------------------------|
| 57-67<br>101-113                  | DIFPY <u>SEN</u> KEK <sup>1</sup>                                                   | QSNASS <u>D</u> VEVEEK <sup>1</sup>                                                                                                                           | QSNASS <u>D</u> VEVEEK <sup>1</sup><br>QSNASS <u>D</u> VEVEEK <sup>2</sup>                                                                                     |
| 101-113/127                       |                                                                                     | QSNASSDVEVEEKETS <u>VSKED</u> <u>TD</u> HEEK <sup>1</sup><br>QSNASSDVEVEEKETS <u>VSKED</u> <u>TD</u> HEEK <sup>1</sup><br>QSNASS <u>D</u> VEVEEK <sup>1</sup> |                                                                                                                                                                |
| 114/128-135                       |                                                                                     | ETS <u>VSKED</u> <u>TD</u> HEEK <u>AS</u> NEDVTK <sup>1</sup><br>ETS <u>VSKED</u> <u>TD</u> HEEK <u>AS</u> NEDVTK <sup>2</sup>                                | ETS <u>VSKED</u> <u>TD</u> HEEK <sup>1</sup><br>ETS <u>VSKED</u> <u>TD</u> HEEK <sup>1</sup><br><u>AS</u> NEDVTK <sup>1</sup><br>AVDIT <u>TPK</u> <sup>1</sup> |
| 136-143<br>156-179                |                                                                                     | AVDIT <u>TPK</u> <sup>1</sup><br>QVETEEAGVVTTATASVNLKV <u>SPK</u> <sup>1</sup>                                                                                | AVDIT <u>TPK</u> <sup>1</sup><br>QVETEEAGVVTTATASVNLKV <u>SPK</u> <sup>1</sup>                                                                                 |
| 202-218<br>267-286                | QPCP <u>SE</u> DIITEEDKSK <sup>1</sup><br>TGVSTSD <u>SE</u> EEGDDQEGEK <sup>1</sup> | TGVSTSD <u>SE</u> EEGDDQEGEK <sup>1</sup><br>TGVSTSD <u>SE</u> EEGDDQEGEK <sup>2</sup>                                                                        | QPCP <u>SE</u> DIITEEDK <sup>1</sup><br>TGVSTSD <u>SE</u> EEGDDQEGEK <sup>1</sup><br>TGVSTSD <u>SE</u> EEGDDQEGEK <sup>2</sup>                                 |
| 344-351<br>510/511-524<br>518-530 |                                                                                     | KKP <u>SE</u> EERETEISLK <sup>1</sup>                                                                                                                         | RET <u>SM</u> DSR <sup>1</sup><br>KPS <u>SE</u> EERETEISLK <sup>1</sup>                                                                                        |

<sup>1</sup> singly-phosphorylated

<sup>2</sup> doubly-phosphorylated

**SUPPLEMENTAL TABLE S4.****LEDGF phosphopeptides reported in global phosphoproteome studies (7,8) and their locations within the amino acid sequence**

Assigned phosphorylation sites are printed in bold type and underlined.

| <b>Location</b> | <b>Olsen <i>et al.</i> 2006 (7)<sup>1</sup><br/>(HeLa)</b>                         | <b>Dephoure <i>et al.</i>, 2008 (8)<sup>1</sup><br/>(Hela, G1)</b>                                                                                                                | <b>Dephoure <i>et al.</i>, 2008 (8)<sup>1</sup><br/>(HeLa, G2)</b>                                                                                                                |
|-----------------|------------------------------------------------------------------------------------|-----------------------------------------------------------------------------------------------------------------------------------------------------------------------------------|-----------------------------------------------------------------------------------------------------------------------------------------------------------------------------------|
| 101-113         | QSNASSDVEVEEK<br>QSNASSDVEVEEK                                                     | QSNASSDVEVEEK                                                                                                                                                                     | QSNASSDVEVEEK                                                                                                                                                                     |
| 101-127         |                                                                                    |                                                                                                                                                                                   | QSNASSDVEVEEKETS <sup>1</sup> VSKED <sup>1</sup> IDHEEK                                                                                                                           |
| 114-127         | ETSVSKED <sup>1</sup> IDHEEK                                                       |                                                                                                                                                                                   |                                                                                                                                                                                   |
| 136-143         | AVDIT <sup>1</sup> TPK                                                             | AVDIT <sup>1</sup> TPK                                                                                                                                                            | AVDIT <sup>1</sup> TPK                                                                                                                                                            |
| 267-286/288     | <u>TGVT</u> <u>STSD</u> SEEEGDDQEGEK<br>TGVTST <sup>1</sup> <u>SD</u> SEEEGDDQEGEK | <u>TGVT</u> <u>STSD</u> SEEEGDDQEGEK<br>TGVT <sup>1</sup> <u>STSD</u> SEEEGDDQEGEKKR<br>TGVT <sup>1</sup> <u>STSD</u> SEEEGDDQEGEK<br>TGVTST <sup>1</sup> <u>SD</u> SEEEGDDQEGEKK | <u>TGVT</u> <u>STSD</u> SEEEGDDQEGEK<br>TGVT <sup>1</sup> <u>STSD</u> SEEEGDDQEGEKKR<br>TGVT <sup>1</sup> <u>STSD</u> SEEEGDDQEGEK<br>TGVTST <sup>1</sup> <u>SD</u> SEEEGDDQEGEKK |
| 425-448         |                                                                                    |                                                                                                                                                                                   | NMFLVGE <sup>1</sup> GDSVITQVLN <sup>1</sup> KSLAEQR<br>NMFLVGE <sup>1</sup> GDSVITQVLN <sup>1</sup> KSLAEQR                                                                      |
| 510-524         | KKPSSEERE <sup>1</sup> TEISLK                                                      |                                                                                                                                                                                   |                                                                                                                                                                                   |
| 518-530         |                                                                                    |                                                                                                                                                                                   | ETEIS <sup>1</sup> LKD <sup>1</sup> STLDN<br>ETEIS <sup>1</sup> LKD <sup>1</sup> STLDN<br>ETEIS <sup>1</sup> LKD <sup>1</sup> STLDN                                               |

<sup>1</sup>See supplemental References**SUPPLEMENTAL REFERENCES**

1. Elderkin, S., Maertens, G. N., Endoh, M., Mallery, D. L., Morrice, N., Koseki, H., Peters, G., Brockdorff, N., and Hiom, K. (2007) *Mol. Cell* **28**, 107-120
2. Cherepanov, P., Devroe, E., Silver, P. A., and Engelman, A. (2004) *J. Biol. Chem.* **279**, 48883-48892
3. Maertens, G., Cherepanov, P., Pluymers, W., Busschots, K., De Clercq, E., Debyser, Z., and Engelborghs, Y. (2003) *J. Biol. Chem.* **278**, 33528-33539
4. Hare, S., Shun, M. C., Gupta, S. S., Valkov, E., Engelman, A., and Cherepanov, P. (2009) *PLoS Pathog.* **5**, e1000259
5. Ulm, J. W., Perron, M., Sodroski, J., and C., M. R. (2007) *Virology* **363**, 245-255
6. Vandegraaff, N., Devroe, E., Turlure, F., Silver, P. A., and Engelman, A. (2006) *Virology* **346**, 415-426
7. Olsen, J. V., Blagoev, B., Gnadt, F., Macek, B., Kumar, C., Mortensen, P., and Mann, M. (2006) *Cell* **127**, 635-648
8. Dephoure, N., Zhou, C., Villen, J., Beausoleil, S. A., Bakalarski, C. E., Elledge, S. J., and Gygi, S. P. (2008) *Proc. Natl. Acad. Sci. U. S. A.* **105**, 10762-10767
